# Supplementary material for: Receptor tyrosine phosphatases control tracheal tube geometries through negative regulation of Egfr signaling
Source: Oxford University Press journal article supplement (doi:10.1242/dev.033597), 2009-08-13
Supplement: dev033597tables1.pdf [file dev033597tables1.pdf]

**Table S1. Quantitative analysis of the cyst phenotype**

| Genotype                                                                         | TC/LT diameter ( $\mu\text{m}$ ) | Number of cysts per GB* | GB diameter ( $\mu\text{m}$ ) |
|----------------------------------------------------------------------------------|----------------------------------|-------------------------|-------------------------------|
| <i>ptp4E<sup>KG2328</sup> ptp10D<sup>1/+</sup></i>                               | 2.8 $\pm$ 0.1 (n=39)             | 0                       | 1.5 $\pm$ 0.1 (n=24)          |
| <i>ptp4E<sup>1</sup> ptp10D<sup>1</sup></i>                                      | 8.4 $\pm$ 0.5 (n=31)             | 4.4 $\pm$ 0.2 (n=31)    | 3.8 $\pm$ 0.1 (n=167)         |
| <i>ptp4E<sup>1</sup> ptp10D<sup>EP1172</sup></i>                                 | 4.1 $\pm$ 0.3 (n=24)             | 3.9 $\pm$ 0.4 (n=23)    | 3.2 $\pm$ 0.1 (n=89)          |
| <i>ptp4E<sup>KG2328</sup> ptp10D<sup>1</sup></i>                                 | 4.4 $\pm$ 0.4 (n=36)             | 4.9 $\pm$ 0.3 (n=35)    | 3.3 $\pm$ 0.1 (n=173)         |
| <i>ptp4E<sup>Df(1)ovo4</sup> ptp10D<sup><math>\Delta</math>59</sup></i>          | 12.2 $\pm$ 0.5 (n=68)            | 3.0 $\pm$ 0.2 (n=60)    | 3.2 $\pm$ 0.1 (n=77)          |
| <i>ptp4E<sup>1</sup> ptp10D<sup>EP1172</sup>; Btl-GAL4</i>                       | 2.8 $\pm$ 0.1 (n=35)             | 0                       | 1.5 $\pm$ 0.1 (n=24)          |
| <i>ptp4E<sup>1</sup> ptp10D<sup>1</sup>; Btl-GAL4&gt;UAS-4E-GFP</i>              | 2.8 $\pm$ 0.1 (n=39)             | 0                       | 1.4 $\pm$ 0.1 (n=24)          |
| <i>Btl-GAL4&gt;<math>\lambda</math>Btl</i>                                       | 3.1 $\pm$ 0.2 (n=20)             | 0                       | –                             |
| <i>ptp4E<sup>1</sup> ptp10D<sup>1</sup>; Btl-GAL4&gt;<math>\lambda</math>Btl</i> | 11.5 $\pm$ 0.7 (n=32)            | 4.8 $\pm$ 0.2 (n=31)    | 4.0 $\pm$ 0.1 (n=150)         |
| <i>ptp4E<sup>1</sup> ptp10D<sup>1</sup>; btl<sup>1187/+</sup></i>                | 6.3 $\pm$ 0.5 (n=30)             | 3.6 $\pm$ 0.4 (n=25)    | 2.7 $\pm$ 0.1 (n=89)          |
| <i>Btl-GAL4&gt;UAS-EGFR-Elp</i>                                                  | 3.0 $\pm$ 0.2 (n=32)             | 0.2 $\pm$ 0.1 (n=32)    | 1.8 $\pm$ 0.1 (n=64)          |
| <i>ptp4E<sup>1</sup> ptp10D<sup>1</sup>; Btl-GAL4&gt;UAS-EGFR-Elp</i>            | 14.2 $\pm$ 0.7 (n=31)            | 6.0 $\pm$ 0.3 (n=31)    | 5.1 $\pm$ 0.1 (n=185)         |
| <i>Btl-GAL4&gt;UAS-EGFR-wt</i>                                                   | 2.9 $\pm$ 0.1 (n=36)             | 0                       | –                             |
| <i>ptp4E<sup>1</sup> ptp10D<sup>1</sup>; Btl-GAL4&gt;UAS-EGFR-wt</i>             | 11.1 $\pm$ 0.8 (n=20)            | 5.4 $\pm$ 0.3 (n=20)    | 4.3 $\pm$ 0.1 (n=109)         |
| <i>ptp4E<sup>1</sup> ptp10D<sup>1</sup>; Btl-GAL4&gt;UAS-dsRNA-EGFR</i>          | 4.1 $\pm$ 0.3 (n=45)             | 3.4 $\pm$ 0.2 (n=42)    | 3.0 $\pm$ 0.1 (n=143)         |
| <i>ptp4E<sup>1</sup> ptp10D<sup>1</sup>; Btl-GAL4&gt;UAS-EGFR-DN</i>             | 4.1 $\pm$ 0.3 (n=72)             | 4.0 $\pm$ 0.2 (n=58)    | 2.9 $\pm$ 0.1 (n=233)         |
| <i>ptp4E<sup>1</sup> ptp10D<sup>1</sup>; Btl-GAL4&gt;UAS-phl (GOF)</i>           | 12.2 $\pm$ 0.4 (n=51)            | 6.9 $\pm$ 0.4 (n=32)    | 3.7 $\pm$ 0.1 (n=220)         |
| <i>ptp4E<sup>1</sup> ptp10D<sup>1</sup>; egfr(k05115)/+</i>                      | 5.1 $\pm$ 0.5 (n=36)             | 3.9 $\pm$ 0.3 (n=36)    | 2.7 $\pm$ 0.1 (n=141)         |

Tr4-7 were scored.

*n* is number of hemisegments scored.

\*Number represents average number of cysts per full-length GB.
